# Supplementary material
Source: PubMed Central journal article supplement (PMC3591522)
Supplement: NIHMS268286-supplement-8.pdf [file NIHMS268286-supplement-8.pdf]

| <b>Supplementary Table 1</b><br><i>Microarray Study Demographics</i> | <i>VMC 55</i>      | <i>MCC 195</i>     | <i>MCC 10</i>      |
|----------------------------------------------------------------------|--------------------|--------------------|--------------------|
| <b>Sample size</b>                                                   | <b>55</b>          | <b>195</b>         | <b>10</b>          |
| <b>Mean Age (s.d.)</b>                                               | <b>62.3 (14.1)</b> | <b>65.3 (12.9)</b> | <b>61.9 (16.3)</b> |
| <b>Sex (%male)</b>                                                   | <b>30 (54.5%)</b>  | <b>106 (54.4%)</b> | <b>7 (70%)</b>     |
| <b>Normal adjacent colon specimens</b>                               | <b>n/a</b>         | <b>n/a</b>         | <b>10</b>          |
| <b>Stage I</b>                                                       | <b>4 (7.3%)</b>    | <b>29 (14.9%)</b>  | <b>2</b>           |
| <b>Stage II</b>                                                      | <b>15 (27.3%)</b>  | <b>61 (31.3%)</b>  | <b>5</b>           |
| <b>Stage III</b>                                                     | <b>19 (34.5%)</b>  | <b>63 (32.3%)</b>  | <b>3</b>           |
| <b>Stage IV</b>                                                      | <b>17 (30.9%)</b>  | <b>42 (21.5%)</b>  | <b>0</b>           |
| <b>Caucasian (%)</b>                                                 | <b>50 (90.9%)</b>  | <b>165 (84.6%)</b> | <b>9 (90%)</b>     |
| <b>Black (%)</b>                                                     | <b>4 (7.3%)</b>    | <b>11 (5.6%)</b>   | <b>0 (0%)</b>      |
| <b>Other (%)</b>                                                     | <b>1 (1.8%)</b>    | <b>19 (9.8%)</b>   | <b>1 (10%)</b>     |
