# Supplementary material
Source: PubMed Central journal article supplement (PMC3591522)

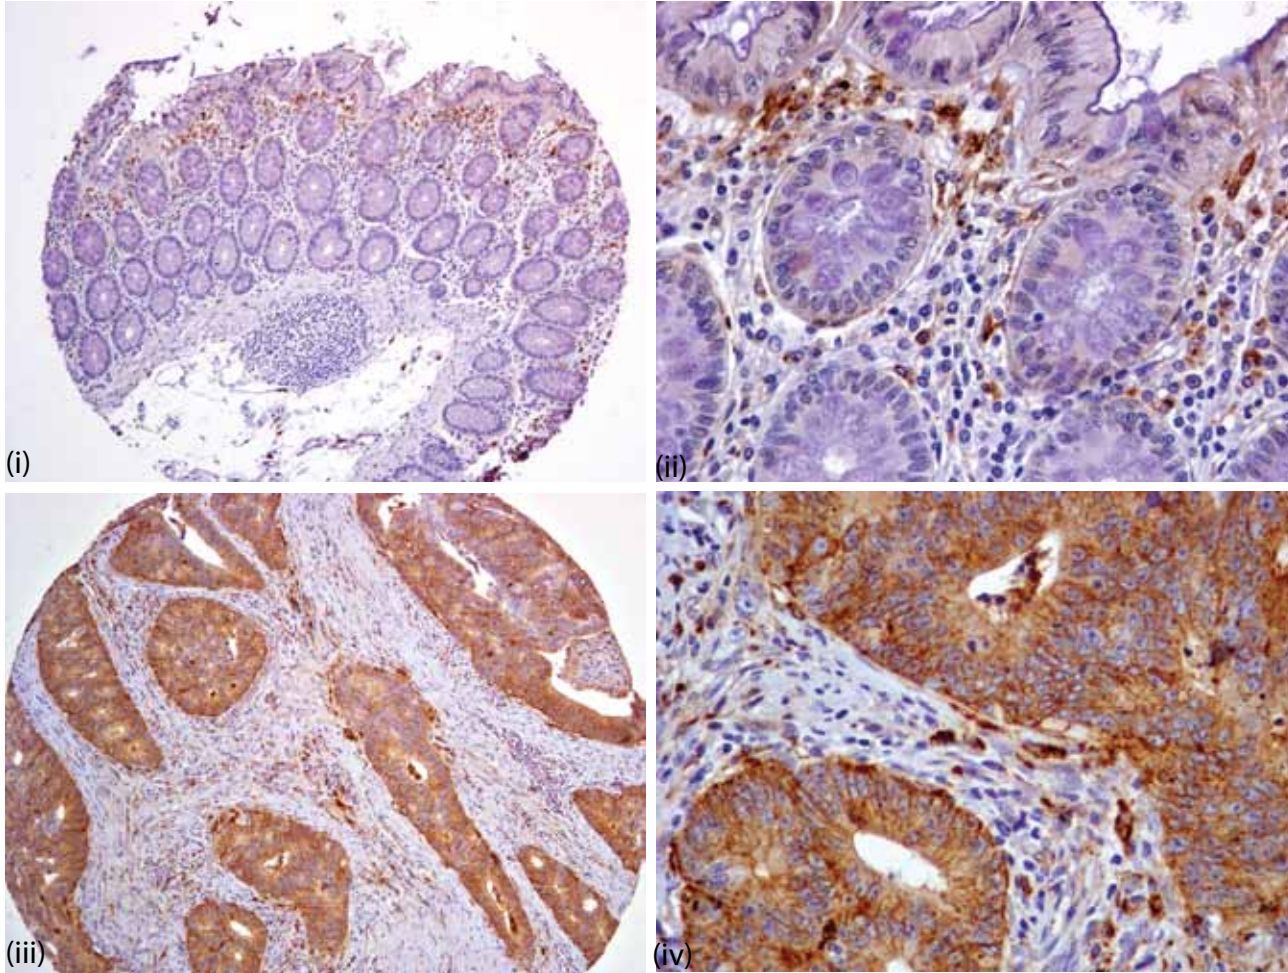

Supple. Fig. 1

Supplement: NIHMS268286-supplement-1.pdf [file NIHMS268286-supplement-1.pdf]

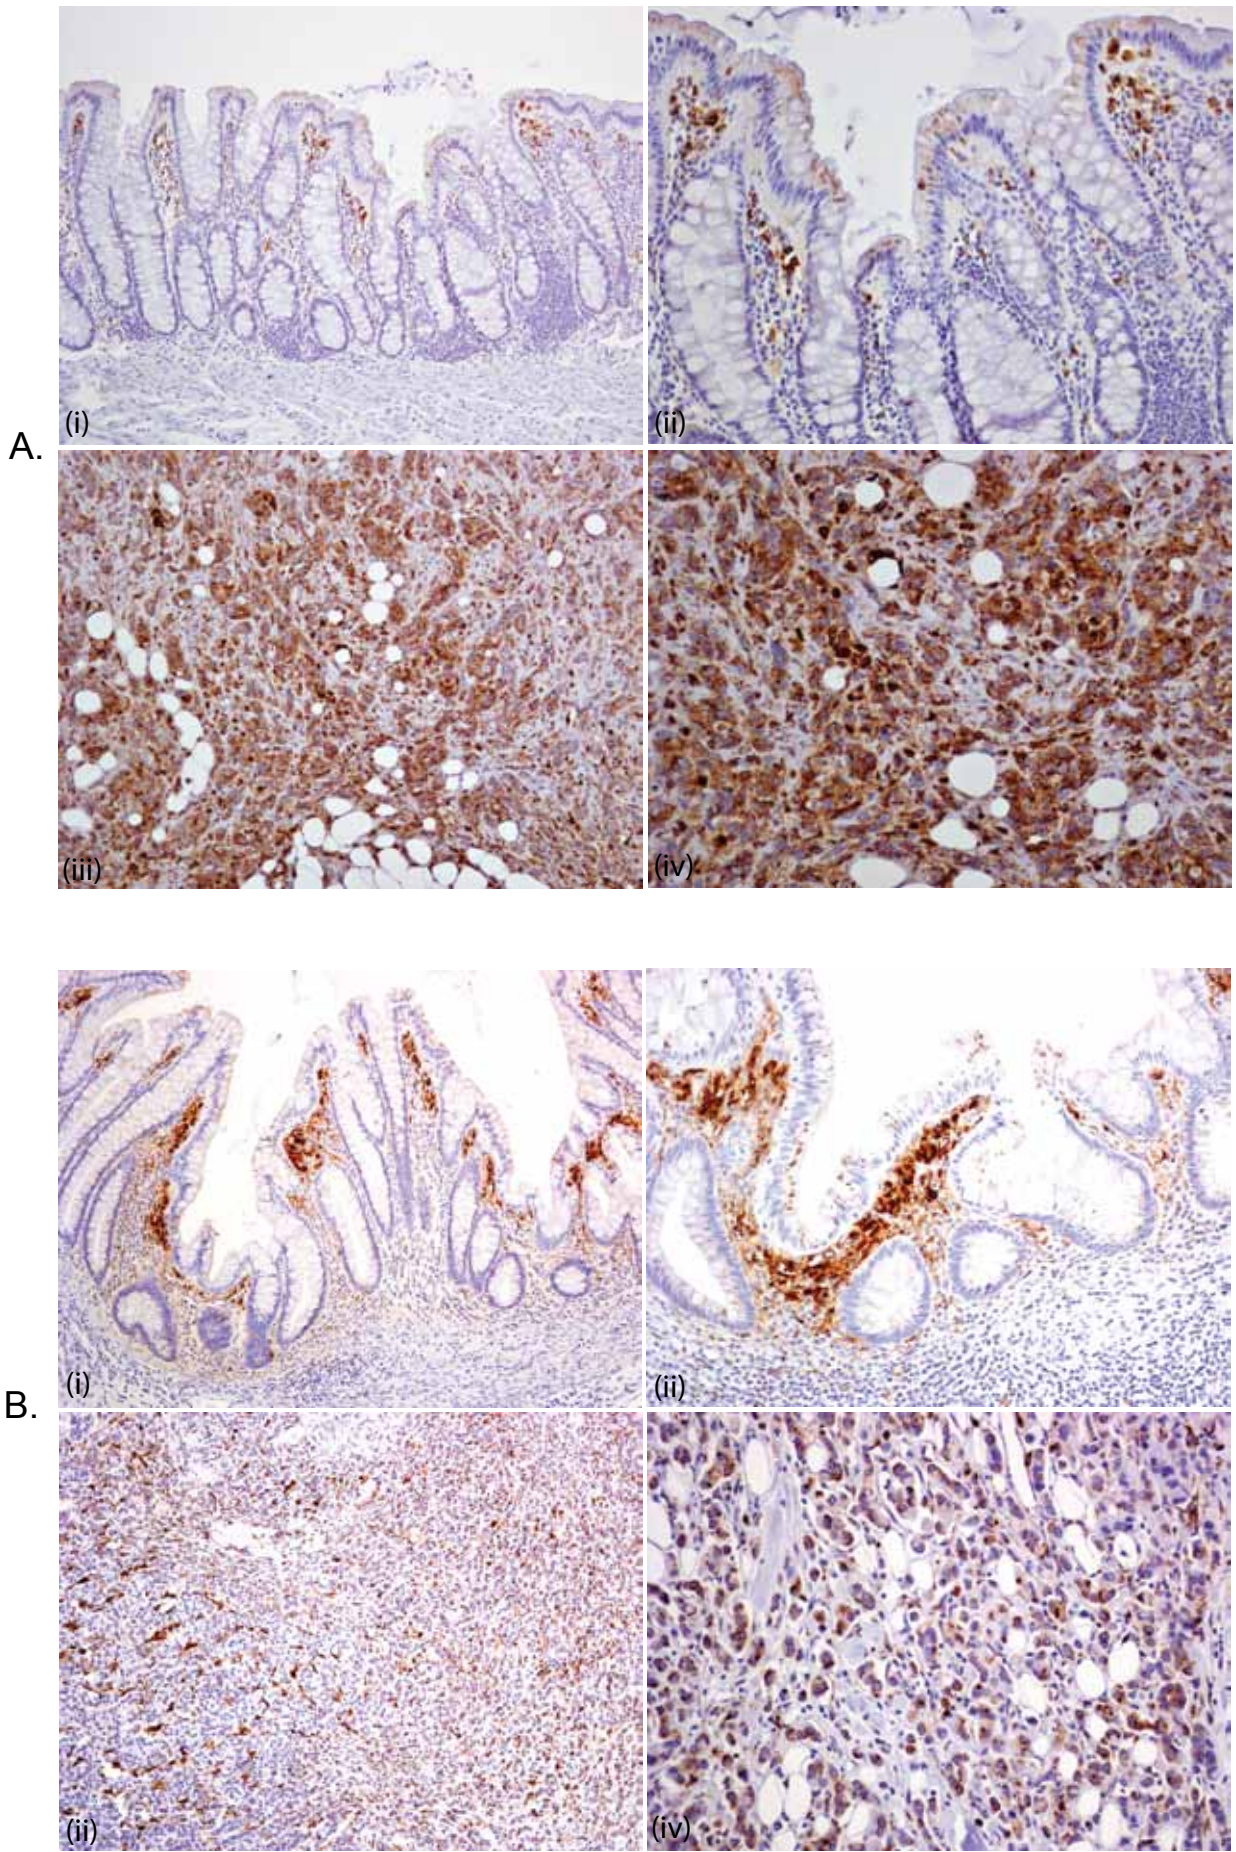

Supple. Fig. 2

Supplement: NIHMS268286-supplement-2.pdf [file NIHMS268286-supplement-2.pdf]

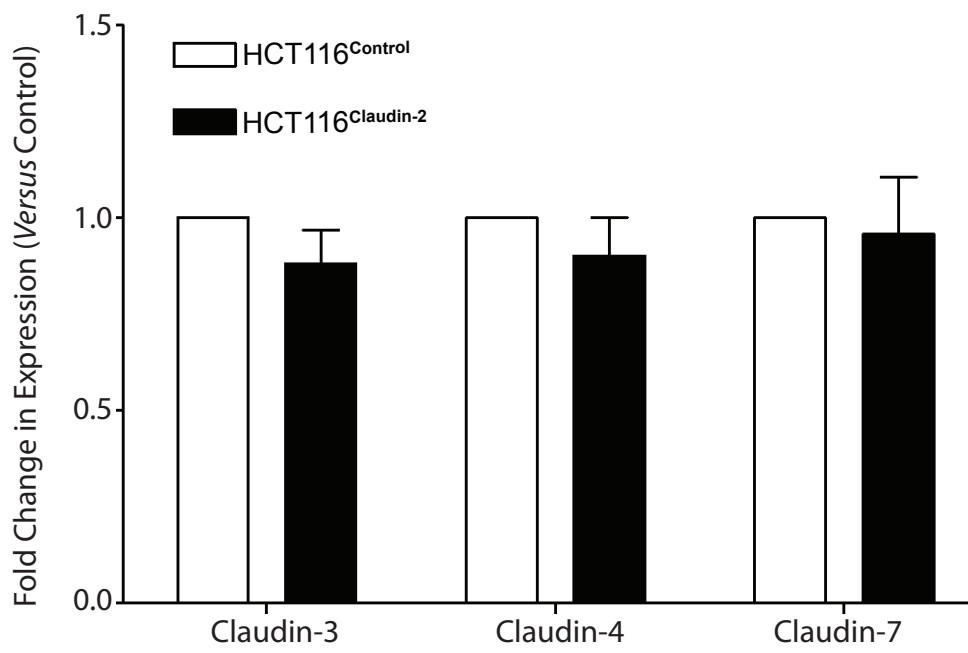

Supple. Fig. 3

Supplement: NIHMS268286-supplement-3.pdf [file NIHMS268286-supplement-3.pdf]

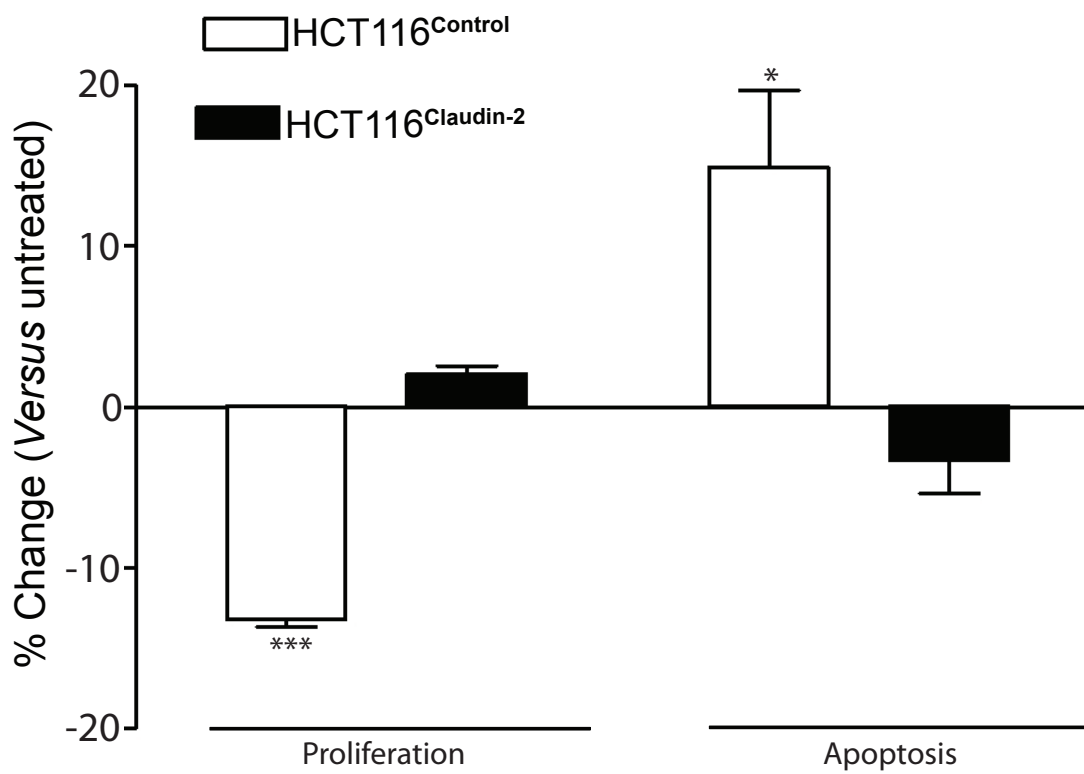

Supple. Fig. 4

Supplement: NIHMS268286-supplement-4.pdf [file NIHMS268286-supplement-4.pdf]

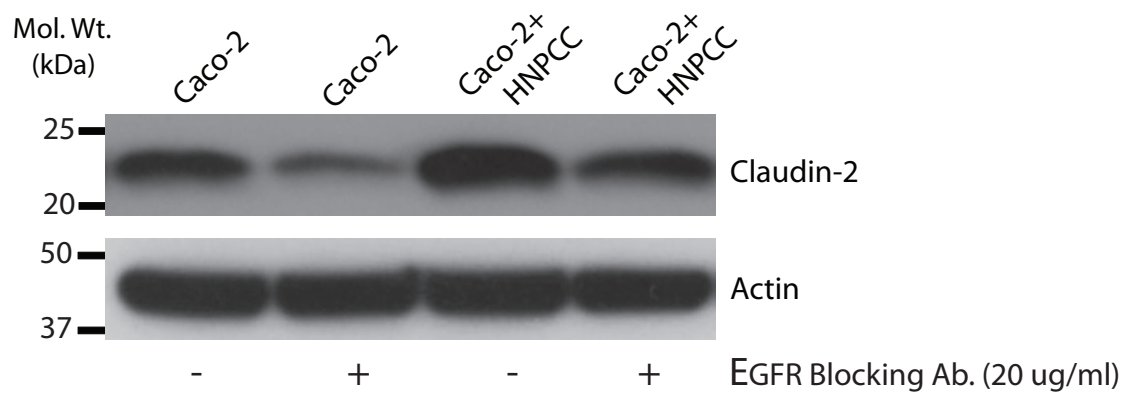

Supple. Fig. 5

Supplement: NIHMS268286-supplement-5.pdf [file NIHMS268286-supplement-5.pdf]

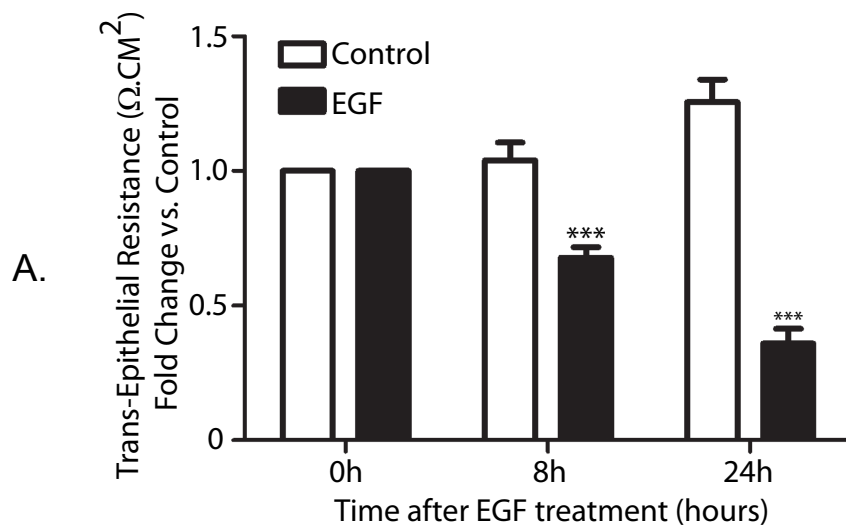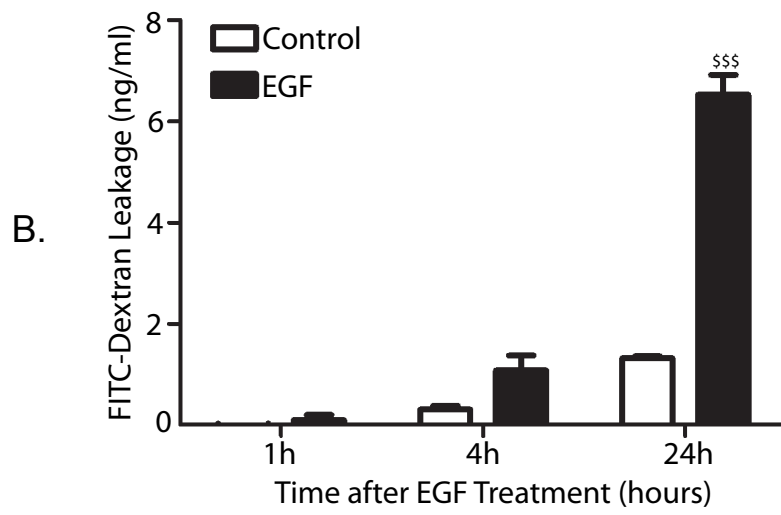

Supple. fig. 6

Supplement: NIHMS268286-supplement-6.pdf [file NIHMS268286-supplement-6.pdf]

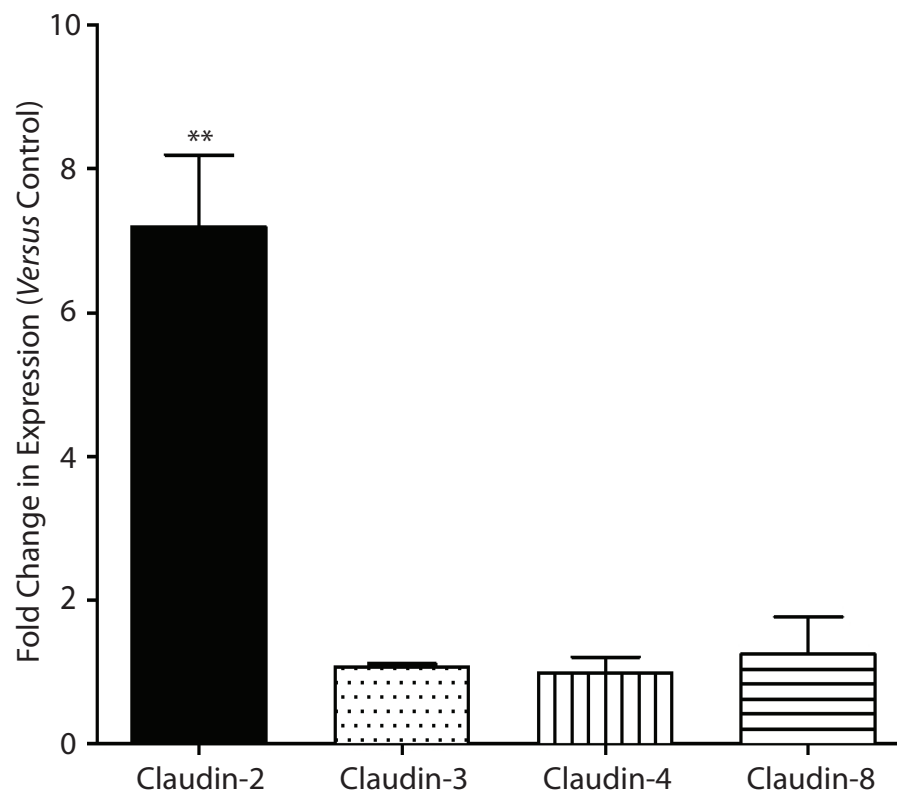

Supple. Fig. 7

Supplement: NIHMS268286-supplement-7.pdf [file NIHMS268286-supplement-7.pdf]
